# Supplementary material for: Multimorbidity and Its Relationship With Long-Term Outcomes After Critical Care Discharge: A Prospective Cohort Study
Source: PubMed Central journal article supplement (PMC9199363; doi:10.1016/j.chest.2021.05.069), 2021-06-18
Supplement: mmc1.pdf [file mmc1.pdf]

# Multimorbidity and Its Relationship With Long-Term Outcomes After Critical Care Discharge

A Prospective Cohort Study

*Joanne McPeake, PhD; Tara Quasim, MD; Philip Henderson, MBChB; Alastair H. Leyland, PhD; Nazir I. Lone, PhD; Matthew Walters, MD; Theodore J. Iwashyna, PhD; and Martin Shaw, PhD*

CHEST 2021; 160(5):1681-1692

*Online supplements are not copyedited prior to posting and the author(s) take full responsibility for the accuracy of all data.*

© 2021 AMERICAN COLLEGE OF CHEST PHYSICIANS. Reproduction of this article is prohibited without written permission from the American College of Chest Physicians. See online for more details. DOI: 110.1016/j.chest.2021.05.069

**e-Figure 1: Love plot of standardised mean difference in matching covariates**

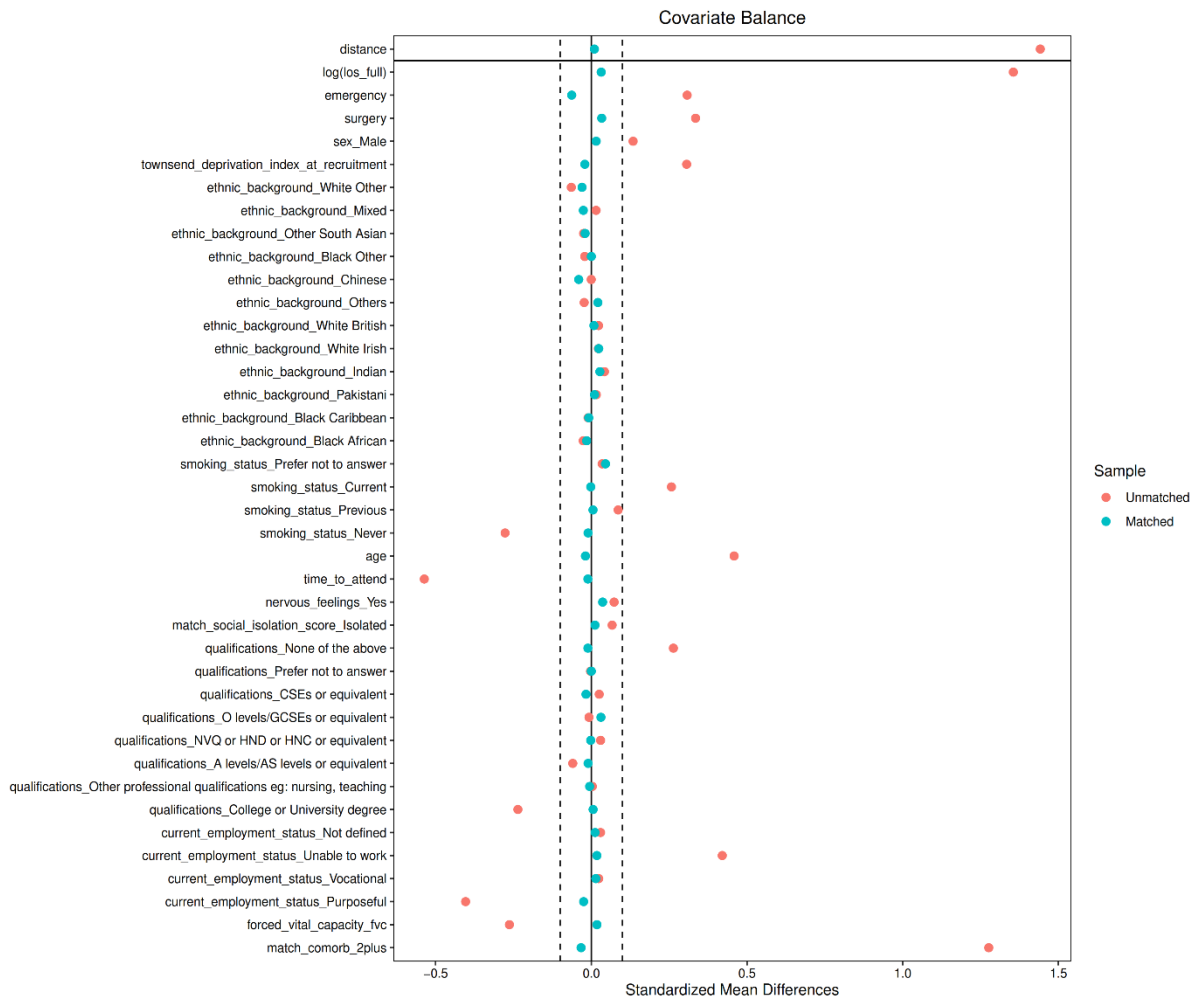

e-Figure2: Count of hospital readmissions in the critical care vs hospital control group over the entire follow-up period.

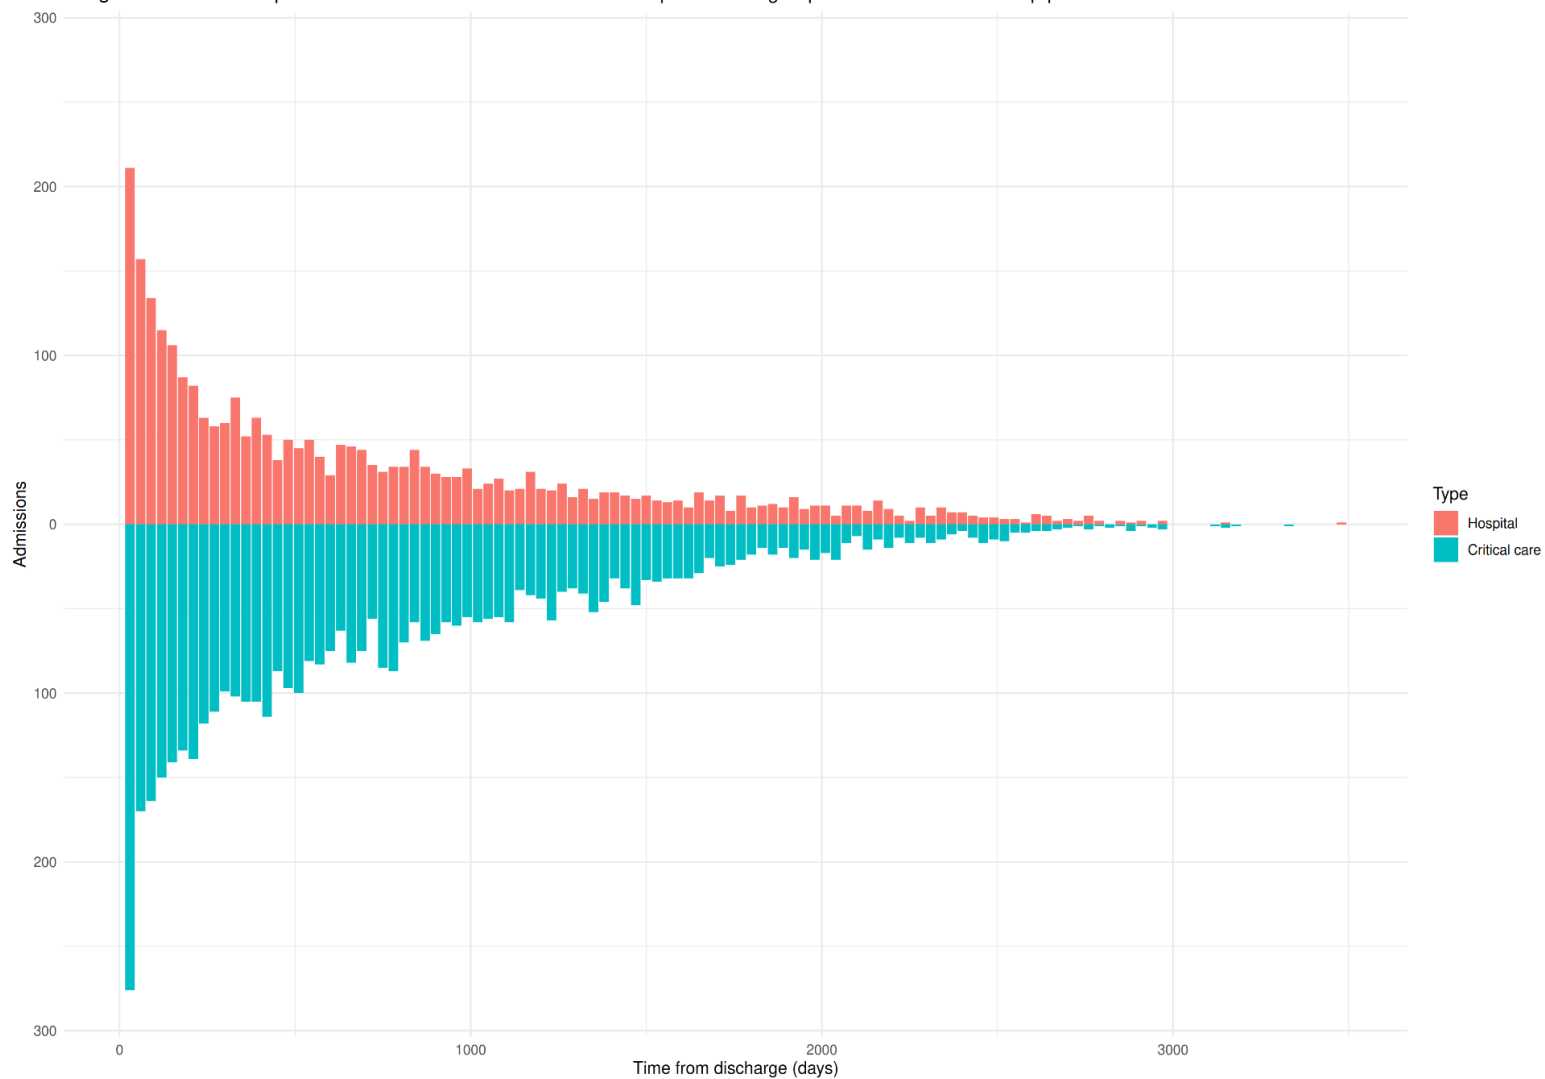

**e-Table 1: UK Biobank Identifiers used in this study**

| <b>Outcome</b>                                                | <b>Biobank Identifier</b> |
|---------------------------------------------------------------|---------------------------|
| Overall Health Rating                                         | 2178                      |
| Frequency of depressed mood in the last two weeks             | 2050                      |
| Nervous feelings (Mental Health)                              | 1970                      |
| Worrier/Anxious feelings                                      | 1980                      |
| Tense/highly strung                                           | 1990                      |
| Seen a GP for nerves, anxiety, tension or depression          | 2090                      |
| Sleeplessness/insomnia                                        | 1200                      |
| Miserableness                                                 | 1930                      |
| Loneliness/isolation (Mental Health)                          | 2020                      |
| Number in household                                           | 709                       |
| Leisure/social activities                                     | 6160                      |
| Frequency of friend/family visits                             | 1031                      |
| Average household income before tax                           | 738                       |
| Current employment status                                     | 6142                      |
| Own or rent accommodation lived in                            | 680                       |
| Attendance/disability/mobility allowance                      | 6416                      |
| Overall health rating                                         | 2178                      |
| Townsend deprivation index at recruitment                     | 189                       |
| Ethnic Background                                             | 21000                     |
| Qualifications                                                | 6138                      |
| Consultant Speciality (Critical Care/ Intensive Therapy Unit) | 41246/41245               |
| Hand Grip Strength (left)                                     | 46                        |
| Hand Grip Strength (right)                                    | 47                        |
| Forced Vital Capacity                                         | 3062                      |
| MET minutes per week for all activity                         | 22040                     |

**e-Table 2: Comorbidities assessed**

Hypothyroidism  
Uncomplicated Diabetes  
Myocardial Infarction  
Neurological Disorders  
Renal Disease  
Deficiency Anaemia  
Hypertension (with complications)  
Chronic Pulmonary Disease  
Rheumatic Disease  
Valvular Disease  
Alcohol Abuse  
Peptic Ulcer Disease  
Congestive Heart Failure  
Cerebrovascular Disease  
Obesity  
Cardiac Arrhythmias  
Peripheral Vascular Disorders  
Mild Liver Disease  
Pulmonary Circulation Disorders  
Blood Loss Anaemia  
Psychoses  
Diabetes Complicated  
Coagulopathy  
Fluid and electrolyte disorders  
Moderate or severe liver disease  
Hemiplegia or Paraplegia  
Drug abuse  
Dementia  
Weight Loss  
Diabetes with chronic complication  
Clinical Depression

**e-Table 3: UK Biobank Assessment Centre variables utilised**

**Figure: Calculation of Social Isolation**

Reference Morneau-Vaillancourt, G. Coleman, JRI. Purves, KL. Et al (2020) The genetic and environmental hierarchical structure of anxiety and depression in the UK Biobank. *Depression and Anxiety*; 37:512-520.

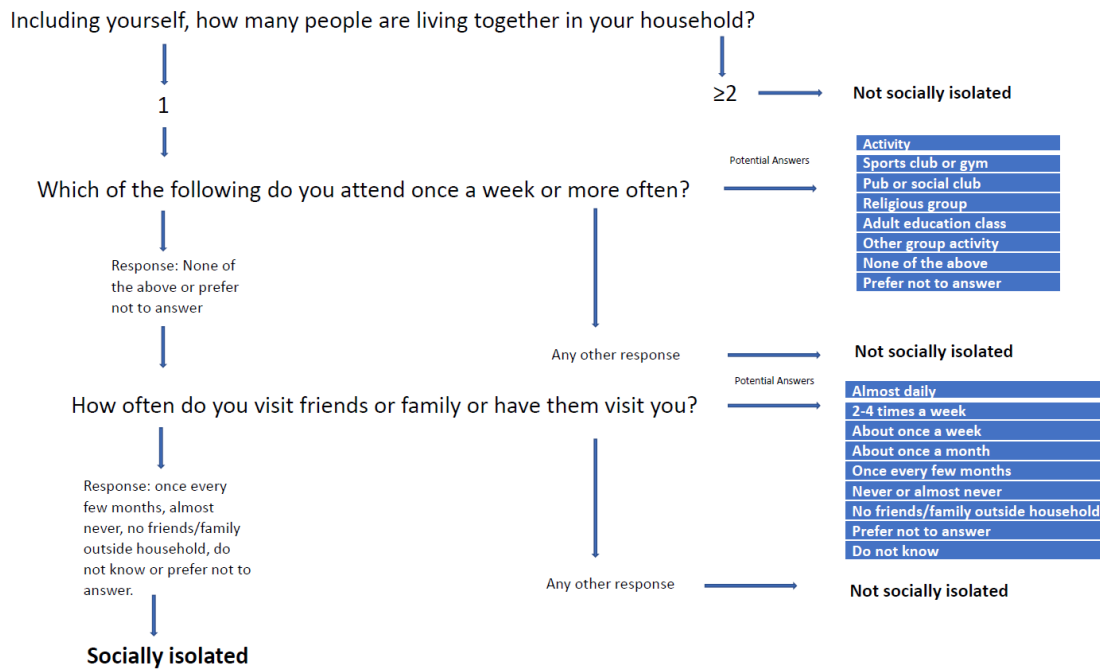

**Tension**

UK Biobank Question: Would you call yourself tense or highly strung?

Potential Answers:

1. Yes
2. No
3. Do not know
4. Prefer not to answer

Positive screen if answered yes

**Nervous Feelings**

UK Biobank Question: Would you call yourself a nervous person?

Potential Answers:

1. Yes
2. No
3. Do not know
4. Prefer not to answer

Positive screen if answered yes

**Loneliness**

UK Biobank Question: Do you often feel lonely?

Potential Answers:

5. Yes
6. No
7. Do not know
8. Prefer not to answer

Positive screen if answered yes

**e-Table 4: Missing data** Proportion of missing variables in UK Biobank

| Variable                   | Missing data (%) |
|----------------------------|------------------|
| Age                        | 0                |
| Gender                     | 0                |
| GP for anxiety/depression  | 1.32             |
| Nervous                    | 2.8              |
| Tense feelings             | 4.76             |
| Loneliness                 | 2.06             |
| Overall health             | 1.64             |
| Employment status          | 0.29             |
| Government allowances      | 0.35             |
| Number in household        | 1.16             |
| Hand grip strength         | 0.96             |
| Forced Vital Capacity      | 13.21            |
| Summed Minutes Activity    | 23.59            |
| Length of stay (full)      | 0                |
| Emergency admission        | 0.03             |
| Townsend deprivation index | 0.19             |
| Ethnic background          | 0.64             |
| Qualifications             | 0.29             |
| Smoking status             | 0.29             |

**e-Table 5: Adjusted Mortality Model (Removing all in-hospital variables)**

| Variable                     | Response           | Unadjusted (95% CI) | Unadjusted p value | Adjusted (95% CI)  | Adjusted p value  |
|------------------------------|--------------------|---------------------|--------------------|--------------------|-------------------|
| Age                          |                    | 1.06 (1.04-1.07)    | <0.001             | 1.06 (1.04-1.07)   | <b>&lt;0.001</b>  |
| Critical Care                |                    | 1.31 (1.11- 1.56)   | 0.001              | 1.04 (0.86-1.26)   | 0.68              |
| Gender                       | Male               | 1.31 (1.10- 1.56)   | 0.002              | 1.38 (1.11- 1.71)  | <b>0.004</b>      |
| GP for anxiety/depression    |                    | 1.16 (0.98- 1.38)   | 0.09               | 0.91 (0.74- 1.11)  | 0.35              |
| Nervous feelings             |                    | 1.22 (1.01- 1.47)   | 0.04               | 1.20 (0.96- 1.50)  | 0.12              |
| Tense feelings               |                    | 1.23 (1.00- 1.51)   | 0.05               | 0.99 (0.78- 1.26)  | 0.96              |
| Loneliness                   |                    | 1.02 (0.84- 1.23)   | 0.87               |                    |                   |
| <b>Overall health</b>        | Fair               | 0.73 (0.57- 0.94)   | 0.01               | 0.87 (0.66- 1.15)  | 0.34              |
|                              | Good               | 0.56 (0.44- 0.71)   | < 0.001            | 0.77 (0.57- 1.04)  | 0.09              |
|                              | Excellent          | 0.30 (0.20- 0.46)   | < 0.001            | 0.49 (0.30- 0.78)  | <b>0.003</b>      |
| <b>Employment status</b>     | Unable to work     | 1.49 (0.60- 3.69)   | 0.39               |                    |                   |
|                              | Vocational         | 1.35 (0.36- 5.04)   | 0.65               |                    |                   |
|                              | Purposeful         | 1.38 (0.57- 3.33)   | 0.47               |                    |                   |
| <b>Government allowances</b> | Blue badge         | 1.76 (1.04-3.00)    | 0.04               | 1.19 (0.69- 2.07)  | 0.53              |
|                              | Allowances         | 1.73 (1.40-2.15)    | < 0.001            | 0.97 (0.75-1.26)   | 0.82              |
| Number in household          |                    | 0.84 (0.78-0.91)    | < 0.001            | 0.92 (0.85- 0.998) | <b>0.046</b>      |
| Hand grip strength           |                    | 0.99 (0.99- 1.00)   | 0.18               |                    |                   |
| Forced vital capacity        |                    | 0.82 (0.75- 0.89)   | < 0.001            | 0.86 (0.77- 0.96)  | <b>0.007</b>      |
| Summed minutes activity      |                    | 1.0 (1- 1)          | 0.01               | 1 (1-1.00)         | 0.52              |
| Townsend deprivation index   |                    | 1.06 (1.03-1.08)    | < 0.001            | 1.04 (1.01- 1.07)  | <b>0.005</b>      |
| <b>Ethnic background</b>     | Mixed              | 0.40 (0.1- 1.59)    | 0.19               |                    |                   |
|                              | South Asian        | 1.12 (0.36- 3.50)   | 0.84               |                    |                   |
|                              | Black              | 1.13 (0.59-2.18)    | 0.72               |                    |                   |
|                              | Chinese            | 0.54 (0.08- 3.80)   | 0.53               |                    |                   |
|                              | Others             | 0.34 (0.05- 2.42)   | 0.28               |                    |                   |
|                              | Indian             | 1.24 (0.64- 2.39)   | 0.53               |                    |                   |
|                              | Pakistani          | 1.10 (0.35- 3.42)   | 0.87               |                    |                   |
| <b>Qualifications</b>        | CSEs               | 0.47 (0.27- 0.81)   | 0.007              | 0.76 (0.44- 1.32)  | 0.33              |
|                              | O levels/GCSEs     | 0.64 (0.48-0.86)    | 0.003              | 0.94 (0.70- 1.27)  | 0.69              |
|                              | NVQ/ HND or HNC    | 0.61 (0.45-0.82)    | 0.001              | 0.84 (0.61- 1.14)  | 0.25              |
|                              | A levels/AS levels | 0.61 (0.42-0.9)     | 0.012              | 0.93 (0.63- 1.38)  | 0.73              |
|                              | Other professional | 0.57 (0.43-0.75)    | < 0.001            | 0.80 (0.60- 1.07)  | 0.13              |
|                              | College/University | 0.72 (0.57-0.90)    | 0.004              | 1.11 (0.87-1.41)   | 0.40              |
| <b>Smoking status</b>        | Current            | 1.89 (1.52- 2.36)   | < 0.001            | 1.81 (1.42- 2.31)  | <b>&lt; 0.001</b> |
|                              | Previous           | 1.41 (1.16- 1.71)   | < 0.001            | 1.24 (1.01-1.51)   | <b>0.04</b>       |



| <b>Comorbidities</b>           |                   |         |                   |                   |
|--------------------------------|-------------------|---------|-------------------|-------------------|
| Hypothyroidism                 | 0.85 (0.60- 1.19) | 0.34    |                   |                   |
| Cardiac arrhythmias            | 1.37 (1.05-1.79)  | 0.02    | 1.06 (0.8- 1.41)  | 0.69              |
| Deficiency anaemia             | 1.52 (1.03- 2.26) | 0.04    | 1 (0.66-1.52)     | 0.99              |
| Chronic pulmonary disease      | 1.45 (1.18- 1.77) | < 0.001 | 0.98 (0.79- 1.23) | 0.87              |
| Diabetes (no complications)    | 1.36 (1.12-1.66)  | 0.002   | 1.02 (0.82- 1.27) | 0.86              |
| Myocardial infarction          | 1.17 (0.90- 1.51) | 0.24    |                   |                   |
| Neurological disorders         | 2.45 (1.9- 3.15)  | < 0.001 | 2.17 (1.63- 2.88) | <b>&lt; 0.001</b> |
| Pulmonary circulation          | 1.66 (1.10- 2.5)  | 0.02    | 1.44 (0.94- 2.22) | 0.1               |
| Cerebrovascular disease        | 1.28 (1.0- 1.65)  | 0.05    | 0.95 (0.73- 1.24) | 0.71              |
| Obesity                        | 1.05 (0.79- 1.4)  | 0.75    |                   |                   |
| Alcohol abuse                  | 1.25 (0.95- 1.63) | 0.11    |                   |                   |
| Congestive heart failure       | 1.83 (1.42- 2.37) | < 0.001 | 1.31 (0.98- 1.74) | 0.06              |
| Fluid/electrolyte disorders    | 1.66 (1.28- 2.14) | < 0.001 | 1.07 (0.81- 1.41) | 0.64              |
| Hypertension complicated       | 1.80 (1.21- 2.70) | 0.004   | 0.74 (0.42- 1.30) | 0.29              |
| Renal disease                  | 1.81 (1.35- 2.41) | < 0.001 | 1.49 (1.01- 2.22) | <b>0.05</b>       |
| Valvular disease               | 1.32 (0.99- 1.77) | 0.06    | 1.01 (0.74- 1.39) | 0.93              |
| Peripheral vascular disorder   | 1.37 (1.04- 1.81) | 0.02    | 0.85 (0.63- 1.15) | 0.29              |
| Weight loss                    | 2.27 (1.51- 3.42) | < 0.001 | 1.62 (1.6- 2.5)   | <b>0.03</b>       |
| Hemiplegia or paraplegia       | 1.0 (0.56- 1.77)  | 0.995   |                   |                   |
| Dementia                       | 4.97 (3.32- 7.44) | < 0.001 | 3.07 (2.0- 4.72)  | <b>&lt; 0.001</b> |
| Peptic ulcer disease           | 1.55 (1.02- 2.35) | 0.04    | 1.08 (0.69- 1.71) | 0.73              |
| Diabetes (complicated)         | 3.15 (2.15- 4.61) | < 0.001 | 1.89 (1.2- 2.99)  | <b>0.006</b>      |
| Rheumatic disease              | 1.35 (0.93- 1.97) | 0.11    |                   |                   |
| Depression                     | 1.7 (1.34- 2.16)  | < 0.001 | 1.49 (1.14- 1.95) | <b>0.004</b>      |
| Mild liver disease             | 2.45 (1.82- 3.29) | < 0.001 | 1.92 (1.35- 2.71) | <b>&lt; 0.001</b> |
| Moderate/ severe liver disease | 3.39 (2.03- 5.66) | < 0.001 | 1.82 (0.95- 3.49) | 0.07              |
| Coagulopathy                   | 1.64 (0.94- 2.84) | 0.08    | 1.08 (0.57-2.04)  | 0.81              |
| Blood loss anaemia             | 0.55 (0.08- 3.93) | 0.55    |                   |                   |
| Psychoses                      | 1.41 (0.77- 2.55) | 0.26    |                   |                   |
| Drug abuse                     | 1.49 (0.48- 4.64) | 0.49    |                   |                   |

**e-Table 6: Adjusted Mortality Model (Removing variables with greater than 10% missing data)**

| Variable                     | Response           | Unadjusted (95% CI) | Unadjusted p value | Adjusted (95% CI) | Adjusted p value |
|------------------------------|--------------------|---------------------|--------------------|-------------------|------------------|
| Age                          |                    | 1.06 (1.04-1.07)    | <0.001             | 1.06 (1.05-1.08)  | <0.001           |
| Critical Care                |                    | 1.31 (1.11- 1.56)   | 0.001              | 1.06 (0.88-1.29)  | 0.53             |
| Gender                       | Male               | 1.31 (1.10- 1.56)   | 0.002              | 1.15 (0.96- 1.38) | 0.14             |
| GP for anxiety/depression    |                    | 1.16 (0.98- 1.38)   | 0.09               | 0.91 (0.75- 1.12) | 0.37             |
| Nervous feelings             |                    | 1.22 (1.01- 1.47)   | 0.04               | 1.19 (0.96- 1.49) | 0.12             |
| Tense feelings               |                    | 1.23 (1.00- 1.51)   | 0.05               | 1.01 (0.79- 1.28) | 0.94             |
| Loneliness                   |                    | 1.02 (0.84- 1.23)   | 0.87               |                   |                  |
| <b>Overall health</b>        | Fair               | 0.73 (0.57- 0.94)   | 0.01               | 0.86 (0.65- 1.13) | 0.27             |
|                              | Good               | 0.56 (0.44- 0.71)   | < 0.001            | 0.74 (0.55- 0.99) | 0.05             |
|                              | Excellent          | 0.30 (0.20- 0.46)   | < 0.001            | 0.45 (0.28- 0.72) | <0.001           |
| <b>Employment status</b>     | Unable to work     | 1.49 (0.60- 3.69)   | 0.39               |                   |                  |
|                              | Vocational         | 1.35 (0.36- 5.04)   | 0.65               |                   |                  |
|                              | Purposeful         | 1.38 (0.57- 3.33)   | 0.47               |                   |                  |
| <b>Government allowances</b> | Blue badge         | 1.76 (1.04-3.00)    | 0.04               | 1.27 (0.73- 2.20) | 0.34             |
|                              | Allowances         | 1.73 (1.40-2.15)    | < 0.001            | 0.99 (0.76-1.28)  | 0.94             |
| Number in household          |                    | 0.84 (0.78-0.91)    | < 0.001            | 0.92 (0.85- 1.00) | 0.06             |
| Hand grip strength           |                    | 0.99 (0.99- 1.00)   | 0.18               |                   |                  |
| Emergency Admission          |                    | 1.52 (1.25-1.86)    | <0.001             | 1.35 (1.10-1.67)  | <b>0.005</b>     |
| Surgical Admission           |                    | 1.12 (0.86-1.45)    | 0.42               |                   |                  |
| Townsend deprivation index   |                    | 1.06 (1.03-1.08)    | < 0.001            | 1.04 (1.01- 1.07) | <b>0.003</b>     |
| Length of Stay (Full)        |                    | 1 (1-1)             | 0.07               | 1 (1-1)           | <b>0.003</b>     |
| <b>Ethnic background</b>     | Mixed              | 0.40 (0.1- 1.59)    | 0.19               |                   |                  |
|                              | South Asian        | 1.12 (0.36- 3.50)   | 0.84               |                   |                  |
|                              | Black              | 1.13 (0.59-2.18)    | 0.72               |                   |                  |
|                              | Chinese            | 0.54 (0.08- 3.80)   | 0.53               |                   |                  |
|                              | Others             | 0.34 (0.05- 2.42)   | 0.28               |                   |                  |
|                              | Indian             | 1.24 (0.64- 2.39)   | 0.53               |                   |                  |
|                              | Pakistani          | 1.10 (0.35- 3.42)   | 0.87               |                   |                  |
| <b>Qualifications</b>        | CSEs               | 0.47 (0.27- 0.81)   | 0.007              | 0.74 (0.42- 1.29) | 0.29             |
|                              | O levels/GCSEs     | 0.64 (0.48-0.86)    | 0.003              | 0.91 (0.68- 1.23) | 0.56             |
|                              | NVQ/ HND or HNC    | 0.61 (0.45-0.82)    | 0.001              | 0.82 (0.60- 1.12) | 0.21             |
|                              | A levels/AS levels | 0.61 (0.42-0.9)     | 0.012              | 0.93 (0.58 -1.02) | 0.73             |
|                              | Other professional | 0.57 (0.43-0.75)    | < 0.001            | 0.77 (0.58- 1.02) | 0.07             |
|                              | College/University | 0.72 (0.57-0.90)    | 0.004              | 1.06 (0.83-1.34)  | 0.65             |

|                                |          |                   |         |                   |                   |
|--------------------------------|----------|-------------------|---------|-------------------|-------------------|
| <b>Smoking status</b>          | Current  | 1.89 (1.52- 2.36) | < 0.001 | 1.84 (1.44- 2.35) | <b>&lt; 0.001</b> |
|                                | Previous | 1.41 (1.16- 1.71) | < 0.001 | 1.23 (1.00-1.50)  | <b>0.049</b>      |
| <b>Comorbidities</b>           |          |                   |         |                   |                   |
| Hypothyroidism                 |          | 0.85 (0.60- 1.19) | 0.34    |                   |                   |
| Cardiac arrhythmias            |          | 1.37 (1.05-1.79)  | 0.02    | 1.07 (0.81- 1.42) | 0.64              |
| Anaemia Deficiency             |          | 1.52 (1.03- 2.26) | 0.04    | 0.96 (0.63-1.46)  | 0.85              |
| Chronic pulmonary disease      |          | 1.45 (1.18- 1.77) | < 0.001 | 1.03 (0.83- 1.28) | 0.79              |
| Diabetes (no complications)    |          | 1.36 (1.12-1.66)  | 0.002   | 1.08 (0.87- 1.35) | 0.49              |
| Myocardial infarction          |          | 1.17 (0.90- 1.51) | 0.24    |                   |                   |
| Neurological disorders         |          | 2.45 (1.9- 3.15)  | < 0.001 | 2.11 (1.59- 2.80) | <b>&lt; 0.001</b> |
| Pulmonary circulation          |          | 1.66 (1.10- 2.5)  | 0.02    | 1.45 (0.94- 2.22) | 0.09              |
| Cerebrovascular disease        |          | 1.28 (1.0- 1.65)  | 0.05    | 0.93 (0.71- 1.21) | 0.59              |
| Obesity                        |          | 1.05 (0.79- 1.4)  | 0.75    |                   |                   |
| Alcohol abuse                  |          | 1.25 (0.95- 1.63) | 0.11    |                   |                   |
| Congestive heart failure       |          | 1.83 (1.42- 2.37) | < 0.001 | 1.28 (0.96- 1.70) | 0.09              |
| Fluid/electrolyte disorders    |          | 1.66 (1.28- 2.14) | < 0.001 | 1.02 (0.77- 1.35) | 0.90              |
| Hypertension complicated       |          | 1.80 (1.21- 2.70) | 0.004   | 0.72 (0.41- 1.26) | 0.24              |
| Renal disease                  |          | 1.81 (1.35- 2.41) | < 0.001 | 1.61 (1.08- 2.38) | <b>0.02</b>       |
| Valvular disease               |          | 1.32 (0.99- 1.77) | 0.06    | 1.03 (0.75- 1.42) | 0.84              |
| Peripheral vascular disorder   |          | 1.37 (1.04- 1.81) | 0.02    | 0.89 (0.66- 1.20) | 0.44              |
| Weight loss                    |          | 2.27 (1.51- 3.42) | < 0.001 | 1.58 (1.03- 2.43) | <b>0.04</b>       |
| Hemiplegia or paraplegia       |          | 1.0 (0.56- 1.77)  | 0.995   |                   |                   |
| Dementia                       |          | 4.97 (3.32- 7.44) | < 0.001 | 2.94 (1.92- 4.50) | <b>&lt; 0.001</b> |
| Peptic ulcer disease           |          | 1.55 (1.02- 2.35) | 0.04    | 1.10 (0.69- 1.74) | 0.69              |
| Diabetes (complicated)         |          | 3.15 (2.15- 4.61) | < 0.001 | 1.81 (1.14- 2.87) | <b>0.01</b>       |
| Rheumatic disease              |          | 1.35 (0.93- 1.97) | 0.11    |                   |                   |
| Depression                     |          | 1.7 (1.34- 2.16)  | < 0.001 | 1.47 (1.13- 1.93) | <b>0.01</b>       |
| Mild liver disease             |          | 2.45 (1.82- 3.29) | < 0.001 | 1.98 (1.40- 2.79) | <b>&lt; 0.001</b> |
| Moderate/ severe liver disease |          | 3.39 (2.03- 5.66) | < 0.001 | 1.69 (0.88- 3.23) | 0.11              |
| Coagulopathy                   |          | 1.64 (0.94- 2.84) | 0.08    | 1.02 (0.55-1.91)  | 0.95              |
| Blood loss anaemia             |          | 0.55 (0.08- 3.93) | 0.55    |                   |                   |
| Psychoses                      |          | 1.41 (0.77- 2.55) | 0.26    |                   |                   |
| Drug abuse                     |          | 1.49 (0.48- 4.64) | 0.49    |                   |                   |

**e-Table 7: Causes of death in the hospital and critical care cohorts**

|                           | <b>Hospital Cohort<br/>(n=261)</b> | <b>Critical care Cohort (n=285)</b> |
|---------------------------|------------------------------------|-------------------------------------|
| Cardiac or vascular       | 36                                 | 54                                  |
| Neuro/stroke (non-cancer) | 57                                 | 25                                  |
| Respiratory (non-cancer)  | 19                                 | 33                                  |
| GI (cancer)               | 26                                 | 23                                  |
| Cancer (other)            | 22                                 | 26                                  |
| Hepatic (non-cancer)      | 10                                 | 11                                  |
| Respiratory (cancer)      | 10                                 | 10                                  |
| Neuro/stroke (cancer)     | 8                                  | 9                                   |
| COVID-19                  | 7                                  | *                                   |
| Diabetes mellitus         | *                                  | 6                                   |
| Other                     | 66                                 | 87                                  |

\*Denotes a value less than five

**e-Table 8: Adjusted and unadjusted analyses alongside incident rate ratios for hospital readmission in the year following ICU**

| Variable                     | Response           | Unadjusted (95% CI) | Unadjusted p value | Adjusted (95% CI) | Adjusted p value |
|------------------------------|--------------------|---------------------|--------------------|-------------------|------------------|
| Age                          |                    | 1.01 (0.99-1.01)    | 0.24               |                   |                  |
| Critical Care                |                    | 1.71 (1.51- 1.95)   | <0.001             | 1.27 (1.12-1.45)  | <b>&lt;0.001</b> |
| Gender                       | Male               | 1.03 (0.90- 1.17)   | 0.67               |                   |                  |
| GP for anxiety/depression    |                    | 1.03 (0.90- 1.17)   | 0.71               |                   |                  |
| Nervous feelings             |                    | 1.06 (0.91- 1.23)   | 0.46               |                   |                  |
| Tense feelings               |                    | 1.27 (1.08- 1.49)   | 0.004              | 0.96 (0.81- 1.12) | 0.58             |
| Loneliness                   |                    | 1.01 (0.87- 1.18)   | 0.87               |                   |                  |
| <b>Overall health</b>        | Fair               | 0.70 (0.56- 0.87)   | 0.001              | 0.83 (0.66- 1.04) | 0.1              |
|                              | Good               | 0.59 (0.48- 0.72)   | < 0.001            | 0.75 (0.59- 0.94) | <b>0.01</b>      |
|                              | Excellent          | 0.48 (0.36- 0.64)   | < 0.001            | 0.76 (0.56- 1.02) | 0.07             |
| <b>Employment status</b>     | Unable to work     | 0.76 (0.42- 1.39)   | 0.37               |                   |                  |
|                              | Vocational         | 0.92 (0.36- 2.31)   | 0.85               |                   |                  |
|                              | Purposeful         | 0.80 (0.45- 1.43)   | 0.45               |                   |                  |
| <b>Government allowances</b> | Blue badge         | 1.28 (0.79-2.06)    | 0.31               | 1.14 (0.74- 1.78) | 0.55             |
|                              | Allowances         | 1.35 (1.11-1.63)    | 0.002              | 1.03 (0.83-1.27)  | 0.81             |
| Number in household          |                    | 0.96 (0.92-1.00)    | < 0.06             | 0.97 (0.93- 1.01) | 0.15             |
| Hand grip strength           |                    | 1.01 (1- 1.01)      | 0.04               | 1 (0.99-1.01)     | 0.88             |
| Forced vital capacity        |                    | 0.97 (0.91- 1.04)   | 0.36               |                   |                  |
| Summed minutes activity      |                    | 1.0 (1- 1)          | 0.68               |                   |                  |
| Length of stay (full)        |                    | 1 (1- 1)            | 0.50               |                   |                  |
| Emergency admission          |                    | 1.01 (0.87- 1.17)   | 0.91               |                   |                  |
| Surgical admission           |                    | 1.30 (1.06-1.59)    | 0.01               | 1.19 (0.98-1.44)  | 0.07             |
| Townsend deprivation index   |                    | 1.01 (0.99-1.03)    | 0.27               |                   |                  |
| <b>Ethnic background</b>     | Mixed              | 0.73 (0.35- 1.54)   | 0.41               | 0.91 (0.45-1.83)  | 0.79             |
|                              | South Asian        | 0.60 (0.22- 1.67)   | 0.33               | 0.69 (0.26-1.81)  | 0.45             |
|                              | Black              | 0.71 (0.41-1.24)    | 0.23               | 0.70 (0.41-1.18)  | 0.18             |
|                              | Chinese            | 13.13 (4.59- 37.6)  | <0.001             | 12.27 (4.53-33.2) | <b>&lt;0.001</b> |
|                              | Others             | 0.44 (0.17- 1.12)   | 0.9                | 0.55 (0.22-1.35)  | 0.19             |
|                              | Indian             | 1.35 (0.8- 2.29)    | 0.27               | 1.08 (0.63-1.83)  | 0.79             |
|                              | Pakistani          | 0.61 (0.23- 1.63)   | 0.33               | 0.73 (0.52-1.19)  | 0.51             |
| <b>Qualifications</b>        | CSEs               | 0.66 (0.46- 0.95)   | 0.02               | 0.73 (0.52- 1.02) | 0.07             |
|                              | O levels/GCSEs     | 1.02 (0.82-1.27)    | 0.86               | 0.97 (0.78- 1.19) | 0.74             |
|                              | NVQ/ HND or HNC    | 0.82 (0.66-1.04)    | 0.1                | 0.96 (0.77- 1.19) | 0.71             |
|                              | A levels/AS levels | 1.43 (1.09-1.89)    | 0.01               | 0.94 (0.72 1.24)  | 0.67             |
|                              | Other professional | 0.86(0.70-1.06)     | 0.16               | 0.97 (0.80- 1.18) | 0.75             |
|                              | College/University | 0.89(0.74-1.07)     | 0.21               | 0.88 (0.73-1.05)  | 0.15             |

|                                |          |                    |         |                   |                   |
|--------------------------------|----------|--------------------|---------|-------------------|-------------------|
| <b>Smoking status</b>          | Current  | 1.29 (1.08- 1.54)  | 0.005   | 1.30 (1.09- 1.55) | <b>0.004</b>      |
|                                | Previous | 1.04 (0.90- 1.20)  | 0.62    | 1.15 (1.00-1.32)  | <b>0.05</b>       |
| <b>Comorbidities</b>           |          |                    |         |                   |                   |
| Hypothyroidism                 |          | 1.01 (0.80- 1.28)  | 0.92    |                   |                   |
| Cardiac arrhythmias            |          | 1.02 (0.82-1.27)   | 0.85    |                   |                   |
| Deficiency anaemia             |          | 1.31 (0.95- 1.82)  | 0.10    | 1.17 (0.86-1.60)  | 0.31              |
| Chronic pulmonary disease      |          | 0.87 (0.73- 1.03)  | 0.12    |                   |                   |
| Diabetes (no complications)    |          | 1.14 (0.97-1.35)   | 0.11    |                   |                   |
| Myocardial infarction          |          | 0.75 (0.61- 0.92)  | 0.006   | 0.75 (0.61-0.92)  | <b>0.007</b>      |
| Neurological disorders         |          | 0.87(0.69- 1.13)   | 0.34    |                   |                   |
| Pulmonary circulation          |          | 0.85 (0.59-1.21)   | 0.38    |                   |                   |
| Cerebrovascular disease        |          | 0.62 (0.50-0.77)   | <0.001  | 0.66 (0.54- 0.81) | <b>&lt;0.001</b>  |
| Obesity                        |          | 1.31 (1.05- 1.62)  | 0.02    | 0.93 (0.75-1.15)  | 0.51              |
| Alcohol abuse                  |          | 0.78 (0.62-0.97)   | 0.03    | 0.67 (0.54-0.84)  | <b>&lt;0.001</b>  |
| Congestive heart failure       |          | 1.34 (1.07- 1.68)  | 0.01    | 0.98 (0.77- 1.24) | 0.87              |
| Fluid/electrolyte disorders    |          | 1.97 (1.61- 2.42)  | < 0.001 | 1.33 (1.08- 1.64) | <b>0.008</b>      |
| Hypertension complicated       |          | 5.71 (4.07- 8.01)  | <0.001  | 1.84(1.16- 2.91)  | <b>0.009</b>      |
| Renal disease                  |          | 4.15 (3.30- 5.23)  | < 0.001 | 1.48(1.08- 2.03)  | <b>0.02</b>       |
| Valvular disease               |          | 1.48 (1.17- 1.87)  | 0.001   | 1.18 (0.93- 1.49) | 0.18              |
| Peripheral vascular disorder   |          | 1.83 (1.43- 2.28)  | <0.001  | 1.01 (0.80- 1.28) | 0.91              |
| Weight loss                    |          | 1.51 (1.03- 2.02)  | 0.04    | 1.59 (1.11- 2.28) | <b>0.01</b>       |
| Hemiplegia or paraplegia       |          | 0.86 (0.55- 1.35)  | 0.51    |                   |                   |
| Dementia                       |          | 0.62 (0.36- 1.04)  | 0.07    | 0.64 (0.39- 1.06) | <b>0.08</b>       |
| Peptic ulcer disease           |          | 1.26 (0.88- 1.79)  | 0.20    |                   |                   |
| Diabetes (complicated)         |          | 2.55 (1.7- 3.82)   | < 0.001 | 1.08 (0.72- 1.64) | 0.70              |
| Rheumatic disease              |          | 1.03 (0.75- 1.41)  | 0.85    |                   |                   |
| Depression                     |          | 1.29 (1.04- 1.60)  | 0.02    | 1.11 (0.90- 1.38) | 0.33              |
| Mild liver disease             |          | 3.11 (2.37- 4.06)  | < 0.001 | 2.16 (1.65- 2.82) | <b>&lt; 0.001</b> |
| Moderate/ severe liver disease |          | 1.19 (0.72- 1.98)  | < 0.50  |                   |                   |
| Coagulopathy                   |          | 0.8 (0.50- 1.29)   | 0.36    |                   |                   |
| Blood loss anaemia             |          | 1.34 (0.44- 4.06)  | 0.61    |                   |                   |
| Psychoses                      |          | 0.71 (0.41- 1.24)  | 0.23    |                   |                   |
| Drug abuse                     |          | 9.71 (4.02- 23.47) | <0.001  | 2.20 (0.90-5.34)  | 0.08              |

**e-Table 9: Adjusted and unadjusted analyses alongside Odd Ratio of hospital readmission risk in the year following ICU discharge**

| Variable                     | Response           | Unadjusted (95% CI) | Unadjusted p value | Adjusted (95% CI) | Adjusted p value |
|------------------------------|--------------------|---------------------|--------------------|-------------------|------------------|
| Age                          |                    | 1.0 (0.99-1.01)     | 0.8                |                   |                  |
| Critical Care                |                    | 1.44 (1.25- 1.66)   | <0.001             | 1.29 (1.11-1.50)  | <b>&lt;0.001</b> |
| Gender                       | Male               | 1.14 (0.99- 1.31)   | 0.07               | 1.13 (0.97-1.32)  | 0.11             |
| GP for anxiety/depression    |                    | 1.2 (1.04- 1.39)    | 0.02               | 1.06 (0.9-1.25)   | 0.46             |
| Nervous feelings             |                    | 1.02 (0.87- 1.21)   | 0.78               |                   |                  |
| Tense feelings               |                    | 1.06 (0.77- 1.27)   | 0.55               |                   |                  |
| Loneliness                   |                    | 1.14 (0.97- 1.35)   | 0.12               |                   |                  |
| <b>Overall health</b>        | Fair               | 0.66 (0.52- 0.85)   | 0.001              | 0.79 (0.60- 1.04) | 0.09             |
|                              | Good               | 0.54 (0.42- 0.68)   | < 0.001            | 0.75 (0.57- 0.99) | <b>0.05</b>      |
|                              | Excellent          | 0.54 (0.39- 0.73)   | < 0.001            | 0.80 (0.56- 1.13) | 0.21             |
| <b>Employment status</b>     | Unable to work     | 0.85 (0.43- 1.65)   | 0.62               |                   |                  |
|                              | Vocational         | 0.81 (0.29- 2.26)   | 0.69               |                   |                  |
|                              | Purposeful         | 0.67 (0.35- 1.28)   | 0.23               |                   |                  |
| <b>Government allowances</b> | Blue badge         | 1.64 (0.96-2.80)    | 0.07               | 1.26 (0.73- 2.19) | 0.41             |
|                              | Allowances         | 1.47 (1.18-1.82)    | <0.001             | 1.07 (0.83-1.37)  | 0.62             |
| Number in household          |                    | 0.98 (0.94-1.03)    | < 0.49             |                   |                  |
| Hand grip strength           |                    | 1.0 (0.99-1.01)     | 0.62               |                   |                  |
| Forced vital capacity        |                    | 0.98 (0.91- 1.05)   | 0.56               |                   |                  |
| Summed minutes activity      |                    | 1.0 (1- 1)          | 0.44               |                   |                  |
| Length of stay (full)        |                    | 1 (1- 1)            | 0.51               |                   |                  |
| Emergency admission          |                    | 0.97 (0.82- 1.13)   | 0.68               |                   |                  |
| Surgical admission           |                    | 1.14 (0.92-1.42)    | 0.24               |                   |                  |
| Townsend deprivation index   |                    | 1.03 (1.01-1.05)    | 0.007              | 1.01(0.99-1.04)   | 0.28             |
| <b>Ethnic background</b>     | Mixed              | 2.08 (0.92- 4.71)   | 0.08               | 2.25 (0.97-5.2)   | 0.06             |
|                              | South Asian        | 1.56 (0.54- 4.5)    | 0.41               | 1.4 (0.47-4.15)   | 0.54             |
|                              | Black              | 1.22 (0.68-2.2)     | 0.51               | 1.08 (0.59-1.99)  | 0.80             |
|                              | Chinese            | 0.33 (0.07- 1.61)   | 0.17               | 0.48 (0.10-2.32)  | 0.36             |
|                              | Others             | 0.68 (0.27- 1.74)   | 0.42               | 0.57 (0.21-1.51)  | 0.26             |
|                              | Indian             | 1.12 (0.61- 2.04)   | 0.72               | 0.95 (0.50-1.78)  | 0.86             |
|                              | Pakistani          | 0.78(0.28- 2.19)    | 0.64               | 0.72 (0.25-2.07)  | 0.54             |
| <b>Qualifications</b>        | CSEs               | 0.69 (0.47- 1.01)   | 0.06               | 0.71 (0.47- 1.05) | 0.09             |
|                              | O levels/GCSEs     | 0.71 (0.56-0.92)    | 0.08               | 0.74 (0.58- 0.96) | 0.02             |
|                              | NVQ/ HND or HNC    | 1.06 (0.83-1.36)    | 0.64               | 1.09 (0.85- 1.41) | 0.49             |
|                              | A levels/AS levels | 0.78 (0.57-1.06)    | 0.11               | 0.80 (0.58 1.12)  | 0.19             |
|                              | Other professional | 0.99 (0.79-1.25)    | 0.96               | 1.09 (0.86- 1.37) | 0.49             |
|                              | College/University | 0.85 (0.69-1.03)    | 0.10               | 0.91 (0.74-1.13)  | 0.39             |

|                                |          |                    |        |                   |             |
|--------------------------------|----------|--------------------|--------|-------------------|-------------|
| <b>Smoking status</b>          | Current  | 1.29 (1.07- 1.58)  | 0.009  | 1.19 (0.96- 1.47) | 0.11        |
|                                | Previous | 1.17 (1.00- 1.37)  | 0.05   | 1.12 (0.95-1.32)  | 0.18        |
| <b>Comorbidities</b>           |          |                    |        |                   |             |
| Hypothyroidism                 |          | 1.27 (0.98- 1.65)  | 0.07   | 1.22 (0.93-1.60)  | 0.15        |
| Cardiac arrhythmias            |          | 1.21 (0.88-1.42)   | 0.35   |                   |             |
| Deficiency anaemia             |          | 1.93 (1.33- 2.79)  | <0.001 | 1.52 (1.03-2.25)  | <b>0.03</b> |
| Chronic pulmonary disease      |          | 1.1 (0.92- 1.33)   | 0.30   |                   |             |
| Diabetes (no complications)    |          | 1.10 (0.91-1.31)   | 0.30   |                   |             |
| Myocardial infarction          |          | 0.99 (0.80- 1.24)  | 0.94   |                   |             |
| Neurological disorders         |          | 1.09 (0.84- 1.43)  | 0.52   |                   |             |
| Pulmonary circulation          |          | 1.02 (0.69-1.5)    | 0.92   |                   |             |
| Cerebrovascular disease        |          | 0.80 (0.64-1.0)    | 0.05   | 0.78 (0.62- 0.98) | 0.03        |
| Obesity                        |          | 1.29 (1.02-1.64)   | 0.04   | 1.09 (0.84-1.40)  | 0.52        |
| Alcohol abuse                  |          | 1.08 (0.85-1.37)   | 0.53   |                   |             |
| Congestive heart failure       |          | 1.21 (0.94- 1.55)  | 0.14   |                   |             |
| Fluid/electrolyte disorders    |          | 1.04 (0.82- 1.31)  | 0.76   |                   |             |
| Hypertension complicated       |          | 1.44 (0.94-2.22)   | 0.09   | 0.99 (0.62-1.58)  | 0.98        |
| Renal disease                  |          | 1.23 (0.92- 1.63)  | 0.17   |                   |             |
| Valvular disease               |          | 1.29 (0.99- 1.68)  | 0.06   | 1.18 (0.90- 1.55) | 0.24        |
| Peripheral vascular disorder   |          | 1.27 (1.98- 1.64)  | 0.07   | 1.01 (0.77- 1.32) | 0.96        |
| Weight loss                    |          | 1.64 (1.06- 2.52)  | 0.03   | 1.33 (0.85- 2.08) | 0.22        |
| Hemiplegia or paraplegia       |          | 1.31 (0.81- 2.13)  | 0.27   |                   |             |
| Dementia                       |          | 0.68 (0.39-1.18)   | 0.17   |                   |             |
| Peptic ulcer disease           |          | 1.52 (1.02- 2.25)  | 0.04   | 1.08 (0.72-1.64)  | 0.70        |
| Diabetes (complicated)         |          | 1.56 (0.97- 2.52)  | 0.07   | 1.04 (0.62- 1.76) | 0.87        |
| Rheumatic disease              |          | 1.39 (0.98- 1.96)  | 0.06   | 1.30 (0.90-1.86)  | 0.16        |
| Depression                     |          | 1.52 (1.20- 1.93)  | <0.001 | 1.28 (0.98- 1.66) | 0.07        |
| Mild liver disease             |          | 1.72 (1.24- 2.38)  | 0.001  | 1.49 (1.06- 2.10) | <b>0.02</b> |
| Moderate/ severe liver disease |          | 1.16 (0.67- 2.04)  | 0.59   |                   |             |
| Coagulopathy                   |          | 1.05 (0.63- 1.75)  | 0.84   |                   |             |
| Blood loss anaemia             |          | 4.67 (0.99- 22.00) | 0.05   |                   |             |
| Psychoses                      |          | 0.74 (0.41- 1.35)  | 0.33   |                   |             |
| Drug abuse                     |          | 0.73 (0.24- 2.22)  | 0.57   |                   |             |
